# Supplementary material for: ZnMn2O4 nanorods: an effective Fenton-like heterogeneous catalyst with t2g3eg1 electronic configuration
Source: Royal Society of Chemistry journal article supplement (doi:10.1039/c8cy00436f), 2018-01-01
Supplement: c8cy00436f1.pdf [file c8cy00436f1.pdf]

## Electronic Supplementary Information

### ZnMn<sub>2</sub>O<sub>4</sub> Nanorods: An Effective Fenton-like Heterogeneous Catalyst with $t_{2g}^3 e_g^1$ Electronic Configuration

Maoqin Qiu,<sup>a</sup> Zhangxian Chen,<sup>\*a</sup> Zeheng Yang,<sup>\*a</sup> Wenming Li,<sup>a</sup> Yuan Tian,<sup>a</sup>  
Weixin Zhang,<sup>\*a</sup> Yishu Xu<sup>a</sup> and Hansong Cheng<sup>b</sup>

<sup>a</sup> School of Chemistry and Chemical Engineering, Hefei University of Technology,  
Hefei, China 230009

<sup>b</sup> Sustainable Energy Laboratory, Faculty of Material Science and Chemistry, China  
University of Geosciences (Wuhan), 388 Lumo Road, Wuhan, China 430074

Corresponding authors: Tel.:+86 0551 62901450; fax:+86 0551 62901450. Email  
address: [zehengyang@hfut.edu.cn](mailto:zehengyang@hfut.edu.cn) (Z.H. Yang); [zxchen@hfut.edu.cn](mailto:zxchen@hfut.edu.cn) (Z.X. Chen);  
[wxyzhang@hfut.edu.cn](mailto:wxyzhang@hfut.edu.cn) (W.X. Zhang)

## EXPERIMENTAL AND COMPUTATIONAL DETAILS

### Characterizations

The crystal phases of the samples were determined by X-ray diffraction (XRD) on a Rigaku D/max-γB X-ray diffractometer (Cu Kα source,  $\lambda = 0.154178$  nm), operating at 40 kV and 80 mA. Morphologies and structures were characterized by field-emission scanning electron microscopy (FESEM, Hitachi SU8020). The Raman spectra were recorded on a LabRam HR Evolution (HORIBA, France) equipped with a CCD detector using a laser source ( $\lambda_{\text{ex}} = 633$  nm) at room temperature. N<sub>2</sub> adsorption-desorption isotherms were collected on a Quantachrome NOVA 2200e surface area and pore size analyzer at liquid nitrogen temperature. All samples were degassed at 120 °C for 2 h prior to the measurements. The specific surface area and the average pore diameter were calculated by the multi-point Brunauer-Emmett-Teller

(BET) equation and the Barrett-Joyner-Halenda (BJH) method, respectively.

## Computational Details

Periodic density functional theory computations were performed using VASP code implemented with the projector augmented wave method to describe the electron-ion interactions.<sup>1-4</sup> The exchange-correlation potential was expressed using the Perdew-Burke-Ernzerhof functional incorporated in the generalized gradient approximation.<sup>5</sup> The Hubbard  $U$  correction for Mn 3d orbitals was applied to include the strong on-site Coulomb interaction.<sup>6</sup> A  $U$ - $J$  value of 5 eV was found to be sufficient to give reasonable lattice constants and minority spin band gap of about 2.9 eV, in consistence with the reported work.<sup>7</sup> The geometric structures were optimized with the convergence criteria of total energy less than  $10^{-5}$  eV and total force less than 0.01 eV/Å on each atom. The Brillouin zone was sampled using the Monkhorst-Pack  $k$ -point meshes of  $7 \times 7 \times 5$  for structural optimization and  $13 \times 13 \times 9$  for static calculation. The semi core 3p states of Mn were also treated as valence states.

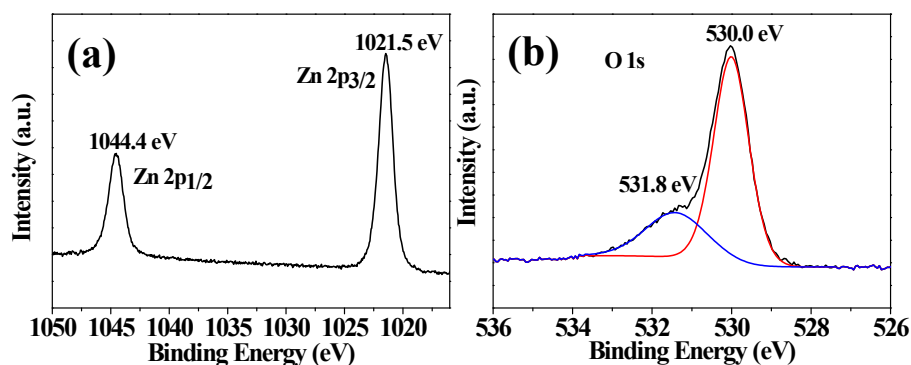

Fig. S1 XPS spectra of ZnMnO<sub>3</sub> nanorods: (a) Zn 2p; (b) O 1s.

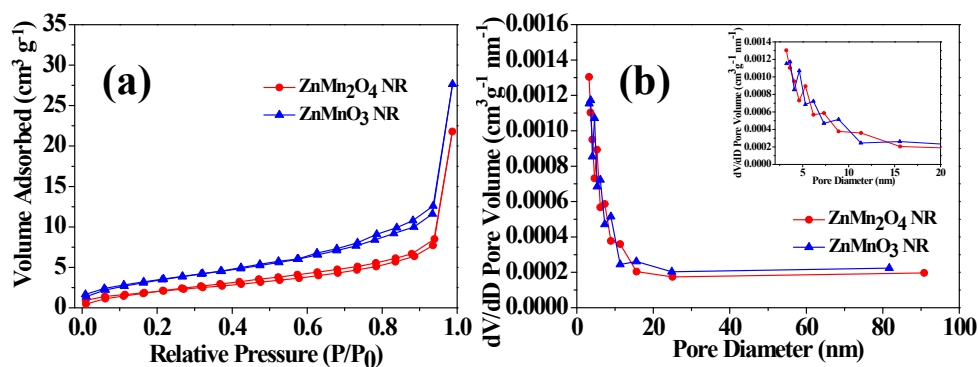

**Fig. S2** (a)  $N_2$  adsorption-desorption isothermal curves and (b) the corresponding pore size distributions of different catalysts.

**Table S1** The specific surface area and average pore size of as-prepared catalysts.

| Sample                                    | Specific Surface Area<br>( $m^2 g^{-1}$ ) | Pore Volume<br>( $cm^3 g^{-1}$ ) |
|-------------------------------------------|-------------------------------------------|----------------------------------|
| ZnMn <sub>2</sub> O <sub>4</sub> nanorods | 17.3                                      | 0.22                             |
| ZnMnO <sub>3</sub> nanorods               | 10.6                                      | 0.11                             |

## References

- 1 G. Kresse, J. Furthmüller, *Comp. Mater. Sci.*, 1996, **6**, 15-50.
- 2 G. Kresse, J. Furthmüller, *Phys. Rev. B*, 1996, **54**, 11169-11186.
- 3 P.E. Blöchl, *Phys. Rev. B*, 1994, **50**, 17953-17979.
- 4 G. Kresse, D. Joubert, *Phys. Rev. B*, 1999, **59**, 1758-1775.
- 5 J. P. Perdew, K. Burke and M. Ernzerhof, *Phys. Rev. Lett.*, 1996, **77**, 3865-3868.
- 6 S. L. Dudarev, G. A. Botton, S. Y. Savrasov and C. J. Humphreys, *Phys. Rev. B*, 1998, **57**, 1505-1509.
- 7 H. C. Choi, J. H. Shim and B. I. Min, *Phys. Rev. B*, 2006, **74**, 172103.
